# Supplementary material for: How Asian Breast Cancer Patients Experience Unequal Incidence of Chemotherapy Side Effects: A Look at Ethnic Disparities in Febrile Neutropenia Rates
Source: MDPI journal article supplement (doi:10.3390/cancers15143590), 2023-07-12
Supplement: s1 [file s1]

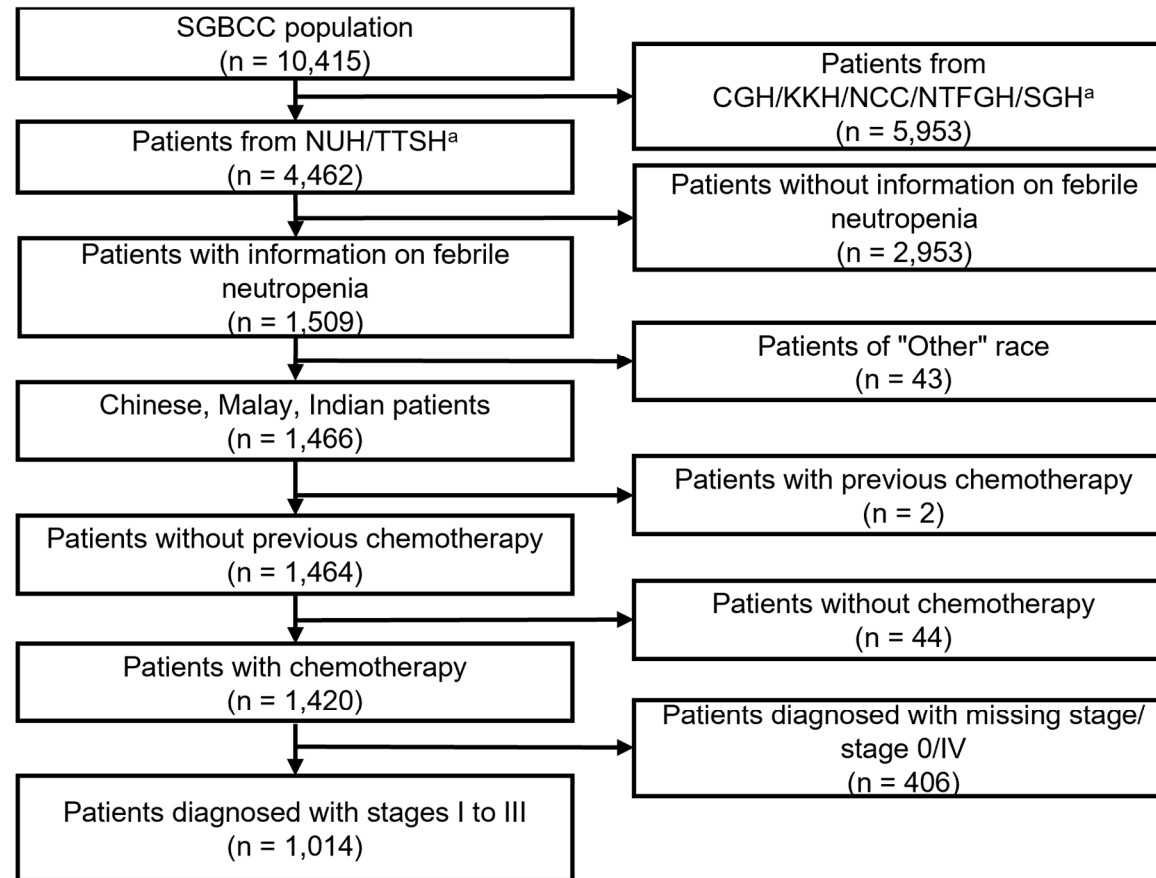

<sup>a</sup>NUH=National University Hospital, KKH=KK Women's and Children's Hospital, TTSH= Tan Tock Seng Hospital, NCCS=National Cancer Centre Singapore, SGH=Singapore General Hospital, CGH=Changi General Hospital, NTFGH=Ng Teng Fong General Hospital.

**Supplementary Figure S1.** Flow chart of SGBCC population.

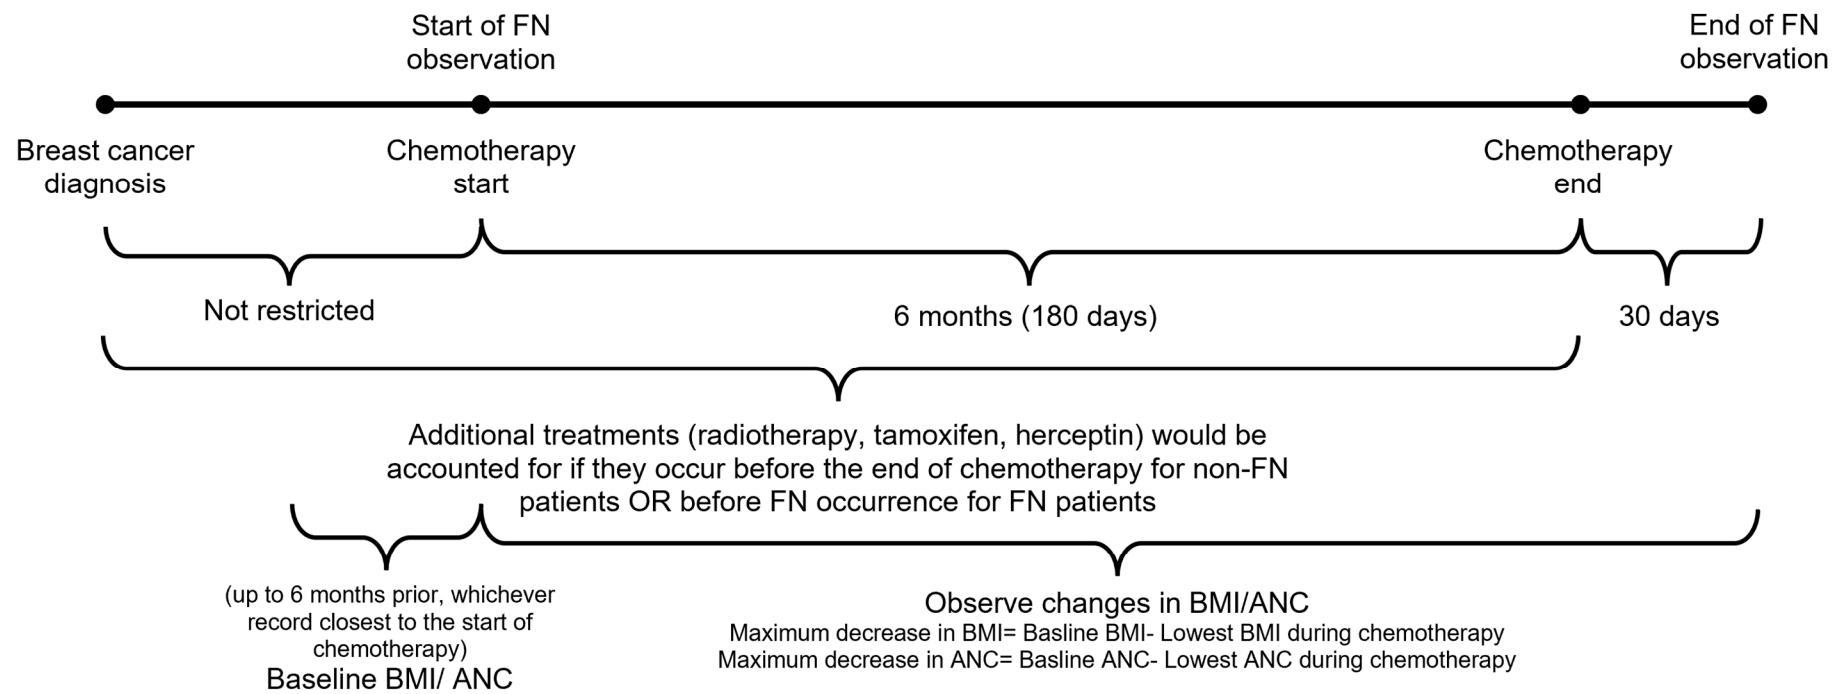

**Supplementary Figure S2.** Schematic of study time points.
