# Supplementary material for: How Asian Breast Cancer Patients Experience Unequal Incidence of Chemotherapy Side Effects: A Look at Ethnic Disparities in Febrile Neutropenia Rates
Source: Cancers (Basel). 2023 Jul 12;15(14):3590. doi: 10.3390/cancers15143590 (PMC10377556; doi:10.3390/cancers15143590)
Supplement: Supplementary file 1 [file cancers-15-03590-s001.zip › Supplementary Table S1.xlsx]

## Sheet: ST1-chemotherapy drugs
Supplementary Table S1. Table of chemotherapy drugs record and categorization.
Drug class	Abbreviations/ terms used in dataset
taxane	THP, TEC, PTH, FAC, HP, TH, TC, TAC, T, TAXOL, TAXOTERE, FUTAXOL, PAC, NAB-PACLItaxel, Pac, PACLITAXELINJ, PACLItaxelINJ, Paclitaxel30mg(ANZATAX)INJ, DOC, DOCE, Docetaxel, DocetaxelINJ, DOCETAXEL, DOCEtaxelINJ, ABRAXANE
antracyclines	TEC, TAC, A, AC, EC, DOXO, DOXORUBICIN, DOXOrubicinINJ, DoxorubicinINJ, DOXOrubicinHCL, LiposomalDOXOrubicin, DOXOCYCLO, EPIrubicinINJ, EP, EPI
alkylating	TEC, IVCMF, PTH, FAC, TC, TAC, AC, CYCLO, CyclophosphamideINJ, CYCLOPHOSPHAMIDE, EC, DOXOCYCLO, OralCMF, CISplatinINJ, CIS, platin, PLATIN, CDDP, CAR, Carbo, CARBO,CARBOplatinINJ, OxaliplatinINJ, OXA
cyclophosphamide	FAC, TC, TAC, AC, CYCLO, CyclophosphamideINJ, CYCLOPHOSPHAMIDE, EC, DOXOCYCLO, OralCMF
alkoid	VNB, VinorelbineINJ, VINO
antimetabollite	IVCMF, FAC, MTX, MethotrexateINJ, XELODA, Xeloda, GEM, FluorouracilINJ, FEC, FU, FUTAXOL, CI5FU, Capecitabine, CAP, PemetrexedINJ
herceptin	PacH, PacHP, THP, PTH, H, HP, TH, TRAS,TRASTuzumabINJ, TRASTuzumab(HERCEPTIN)INJ, HER(TRAS), HER(PER), HER(PERTU), PERTUzumabINJ, HER(PTERTU), PERTU, HER(T-DM1), HER(TDM1), HER(TDM-1), HER
others	BEVA, Others, PEMBRO, ARO, RIBO, ATEZO, LAM, DOCD, TES, FPU, LAP, IXA, ERIBULIN, ERI
