# Supplementary material for: How Asian Breast Cancer Patients Experience Unequal Incidence of Chemotherapy Side Effects: A Look at Ethnic Disparities in Febrile Neutropenia Rates
Source: Cancers (Basel). 2023 Jul 12;15(14):3590. doi: 10.3390/cancers15143590 (PMC10377556; doi:10.3390/cancers15143590)
Supplement: Supplementary file 1 [file cancers-15-03590-s001.zip › Supplementary Table S2.xlsx]

## Sheet: ST2-SGBCC Cox
Supplementary Table S2. Associations of variables with FN occurrence for SGBCC. Hazard ratios (HR) and 95% confidence intervals (CI) were estimated using Cox regression models. Bold indicates statistical significance at p-value <.05.
		Univariate			Adjusted
	Mean (IQR) / n(%)	HR (95% CI)	P	Cox.zph	HR (95% CI)	P	Cox.zph
Age at diagnosis (years IQR)	54.0 (48.0 - 59.8)	1.00 (0.99 - 1.02)	0.697	0.57	1.01 (1.00 - 1.03)	0.149	0.62
Age at diagnosis (categorial)
<40	69 (6.8)	0.71 (0.34 - 1.52)	0.382
40-49	282 (27.8)	1.02 (0.68 - 1.55)	0.919
50-59	382 (37.7)	1.17 (0.80 - 1.71)	0.416
≥60	281 (27.7)	1.00 (Ref)		0.36
Ethnicity
Chinese	781 (77.0)	1.00 (Ref)		0.59	1.00 (Ref)		0.66
Malay	167 (16.5)	2.04 (1.44 - 2.88)	<0.001		2.03 (1.42 - 2.91)	<0.001
Indian	66 (6.5)	1.88 (1.11 - 3.18)	0.018		1.99 (1.17 - 3.40)	0.012
Stage
I	196 (19.3)	1.40 (0.96 - 2.06)	0.083	0.38	1.90 (1.28 - 2.83)	0.001	0.15
II	535 (52.8)	1.00 (Ref)			1.00 (Ref)
III	283 (27.9)	0.98 (0.69 - 1.40)	0.912		0.83 (0.57 - 1.19)	0.308
Grade
Well differentiated	91 (9.0)	1.00 (Ref)		0.99
Moderately differentiated	364 (35.9)	1.45 (0.74 - 2.85)	0.275
Poorly differentiated	521 (51.4)	1.77 (0.92 - 3.39)	0.086
Missing	38 (3.7)	1.16 (0.39 - 3.38)	0.792
Tumour size (cm)
≤2	373 (36.8)	1.00 (Ref)		0.87
>2-5	507 (50.0)	0.87 (0.63 - 1.22)	0.425
>5	95 (9.4)	0.97 (0.57 - 1.65)	0.903
Missing	39 (3.8)	1.77 (0.93 - 3.36)	0.08
Oestrogen receptor status
No	329 (32.4)	1.00 (Ref)		0.41
Yes	679 (67.0)	1.09 (0.79 - 1.50)	0.606
Missing	6 (0.6)	0.00 (0.00 - Inf)	0.993
Progesterone receptor status
No	377 (37.2)	1.00 (Ref)		0.79
Yes	629 (62.0)	1.15 (0.84 - 1.58)	0.38
Missing	8 (0.8)	0.76 (0.11 - 5.47)	0.784
HER2 status
No	629 (62.0)	1.00 (Ref)		0.29
Yes	287 (28.3)	0.87 (0.62 - 1.22)	0.42
Missing	98 (9.7)	0.87 (0.51 - 1.49)	0.604
Subtype
Luminal A	344 (33.9)	1.00 (Ref)		0.46
Luminal B (HER2-neg)	220 (21.7)	1.28 (0.86 - 1.91)	0.226
Luminal B (HER2-pos)	19 (1.9)	0.00 (0.00 - Inf)	0.992
HER2-overexpressed	124 (12.2)	0.68 (0.38 - 1.20)	0.181
Triple negative	139 (13.7)	1.23 (0.78 - 1.96)	0.372
Missing	168 (16.6)	1.07 (0.69 - 1.67)	0.766
Surgery type
Mastectomy	595 (58.7)	1.00 (Ref)		0.6	1.00 (Ref)		0.65
Breast conserving	268 (26.4)	0.57 (0.38 - 0.85)	0.006		0.47 (0.31 - 0.73)	<0.001
No surgery	7 (0.7)	0.00 (0.00 - Inf)	0.992		0.00 (0.00 - Inf)	0.992
Missing	144 (14.2)	1.14 (0.75 - 1.74)	0.545		0.60 (0.38 - 0.95)	0.031
Hormone adjuvant
No	961 (94.8)	1.00 (Ref)		0.21
Yes	45 (4.4)	0.48 (0.18 - 1.31)	0.153
Missing	8 (0.8)	0.87 (0.12 - 6.20)	0.888	0.21
Trastuzumab adjuvant
No	593 (58.5)	1.00 (Ref)		0	1.00 (Ref)		0
Yes	130 (12.8)	0.08 (0.02 - 0.31)	<0.001		0.07 (0.02 - 0.27)	<0.001
Missing	291 (28.7)	1.85 (1.37 - 2.52)	<0.001		1.80 (1.28 - 2.53)	<0.001
