# Supplementary material for: How Asian Breast Cancer Patients Experience Unequal Incidence of Chemotherapy Side Effects: A Look at Ethnic Disparities in Febrile Neutropenia Rates
Source: Cancers (Basel). 2023 Jul 12;15(14):3590. doi: 10.3390/cancers15143590 (PMC10377556; doi:10.3390/cancers15143590)
Supplement: Supplementary file 1 [file cancers-15-03590-s001.zip › Supplementary Table S3.xlsx]

## Sheet: ST3_Full Cox regression
Supplementary Table S3. Associations of variables with FN occurrence for JBCR population, with adjusted models. Hazard ratios (HR) and 95% confidence intervals (CI) were estimated using Cox regression models. Bold indicates statistical significance at p-value <.05.
	Univariate			Adjusted for PC			Adjusted for PC+TC			Adjusted for PC+TC+TT
	HR (95% CI)	P	Cox.zph	HR (95% CI)	P	Cox.zph	HR (95% CI)	P	Cox.zph	HR (95% CI)	P	Cox.zph
Patient characteristics (PC)
Ethnicity
Chinese	1.00 (Ref)		0.04	1.00 (Ref)		0.03	1.00 (Ref)		0.03	1.00 (Ref)		0.04
Malay	1.19 (1.00 - 1.42)	0.052		1.28 (1.06 - 1.53)	0.009		1.27 (1.05 - 1.52)	0.011		1.26 (1.05 - 1.51)	0.014
Indian	1.51 (1.20 - 1.90)	<0.001		1.55 (1.23 - 1.96)	<0.001		1.53 (1.21 - 1.93)	<0.001		1.51 (1.19 - 1.90)	<0.001
Institutiona
NCCS	1.00 (Ref)		0.19	1.00 (Ref)		0.18	1.00 (Ref)		0.18	1.00 (Ref)		0.09
CGH	0.44 (0.33 - 0.58)	<0.001		0.42 (0.31 - 0.56)	<0.001		0.42 (0.31 - 0.56)	<0.001		0.44 (0.33 - 0.59)	<0.001
KKH	1.15 (0.98 - 1.36)	0.091		1.17 (0.99 - 1.38)	0.065		1.19 (1.00 - 1.41)	0.044		0.89 (0.75 - 1.07)	0.225
SGH	1.16 (1.00 - 1.35)	0.05		1.15 (0.98 - 1.34)	0.083		1.15 (0.98 - 1.34)	0.079		1.18 (1.01 - 1.38)	0.04
SKH	1.28 (0.71 - 2.34)	0.414		1.35 (0.74 - 2.45)	0.331		1.33 (0.73 - 2.42)	0.358		1.00 (0.54 - 1.84)	1
Year of diagnosis
Before 2008	1.00 (Ref)		0	1.00 (Ref)		<0.001	1.00 (Ref)		<0.001	1.00 (Ref)		<0.001
During or after 2008	0.84 (0.72 - 0.99)	0.034		0.80 (0.68 - 0.94)	0.006		0.80 (0.68 - 0.94)	0.008		0.81 (0.68 - 0.98)	0.029
Age at diagnosis (years IQR)
	1.01 (1.00 - 1.01)	0.044	0.58	1.01 (1.00 - 1.02)	0.01	0.62	1.01 (1.00 - 1.01)	0.016	0.62	1.01 (1.00 - 1.02)	0.002	0.54
Age at diagnosis (categorial)
<40	0.81 (0.63 - 1.03)	0.08
40-49	0.82 (0.69 - 0.98)	0.026
50-59	0.96 (0.82 - 1.13)	0.648
≥60	1.00 (Ref)		0.17
Menopausal status
Premenopausal	1.00 (Ref)		0.95
Postmenopausal	1.23 (1.07 - 1.42)	0.004
Missing	0.81 (0.68 - 0.98)	0.028
Cancer history
No	1.00 (Ref)		0.45
Yes	1.52 (0.81 - 2.83)	0.191
Family history
No	1.00 (Ref)		0.75
Yes	1.02 (0.85 - 1.22)	0.843
Missing	0.73 (0.62 - 0.86)	<0.001
Baseline Body Mass Index (BMI, kg/m2)	1.00 (0.98 - 1.01)	0.837	0.01
Max BMI drop (kg/m2)	1.15 (1.09 - 1.20)	<0.001	0.22	1.13 (1.08 - 1.19)	<0.001	0.16	1.13 (1.08 - 1.19)	<0.001	0.16	1.12 (1.07 - 1.18)	<0.001	0.13
Baseline ANC (categorical)
≥1.5	1.00 (Ref)
<1.5	2.08 (0.93 - 4.66)	0.073	0
Missing	0.82 (0.72 - 0.94)	0.005	0
Any comorbidity
No	1.00 (Ref)
Yes	0.93 (0.79 - 1.10)	0.4	0.76
Renal disease
No	1.00 (Ref)			1.00 (Ref)
Yes	0.65 (0.48 - 0.88)	0.006	0.91	0.55 (0.18 - 1.67)	0.29	0.15
Diabetes
No	1.00 (Ref)
Yes	0.84 (0.66 - 1.07)	0.156	0.85
Hypertension
No	1.00 (Ref)
Yes	0.90 (0.72 - 1.12)	0.349	0.34
Hyperlipidemia
No	1.00 (Ref)
Yes	0.95 (0.73 - 1.23)	0.687	0.8
Liver disease
No	1.00 (Ref)			1.00 (Ref)			1.00 (Ref)
Yes	0.71 (0.53 - 0.95)	0.02	0.52	2.86 (1.38 - 5.94)	0.005	0.15	1.34 (0.92 - 1.96)	0.131	0.15
Thyroid disorder
No	1.00 (Ref)
Yes	1.05 (0.64 - 1.71)	0.86	0.17
Baseline absolute neutrophil count (ANC, 109/L)	0.94 (0.89 - 0.99)	0.018	0.03	0.92 (0.87 - 0.97)	0.003	0.03	0.92 (0.87 - 0.97)	0.004	0.03	0.93 (0.88 - 0.98)	0.007	0.04
Tumor characteristics (TC)
Stage
I	1.00 (Ref)		0.19				1.00 (Ref)		0.17	1.00 (Ref)		0.2
II	1.02 (0.86 - 1.20)	0.86					1.02 (0.86 - 1.20)	0.862		0.88 (0.74 - 1.05)	0.145
III	1.08 (0.90 - 1.29)	0.427					1.04 (0.87 - 1.25)	0.686		0.82 (0.67 - 0.99)	0.044
Oestrogen receptor status
No	1.00 (Ref)		0.74
Yes	0.87 (0.76 - 0.99)	0.036
Missing	0.75 (0.44 - 1.27)	0.283
Progesterone receptor status
No	1.00 (Ref)		0.68
Yes	0.89 (0.78 - 1.01)	0.078
Missing	0.76 (0.45 - 1.30)	0.315
HER2 status
No	1.00 (Ref)		0.76
Yes	0.93 (0.81 - 1.06)	0.282
Missing	0.87 (0.59 - 1.28)	0.471
Grade
Well differentiated	1.00 (Ref)		0.08
Moderately differentiated	0.94 (0.70 - 1.28)	0.713
Poorly differentiated	1.14 (0.85 - 1.53)	0.365
Missing	1.00 (0.65 - 1.53)	0.999
Tumour size (cm)
≤2	1.00 (Ref)		0.84
>2-5	0.92 (0.80 - 1.06)	0.236
>5	0.86 (0.67 - 1.10)	0.225
Missing	0.60 (0.48 - 0.75)	<0.001
Subtype
Luminal A	1.00 (Ref)		0.81				1.00 (Ref)		0.8	1.00 (Ref)		0.79
Luminal B (HER2-neg)	1.12 (0.94 - 1.35)	0.21					1.11 (0.92 - 1.33)	0.284		1.26 (1.05 - 1.51)	0.014
Luminal B (HER2-pos)	1.23 (0.75 - 2.01)	0.412					1.09 (0.67 - 1.78)	0.732		1.91 (1.16 - 3.14)	0.012
HER2-overexpressed	1.12 (0.91 - 1.39)	0.295					1.11 (0.89 - 1.37)	0.36		1.98 (1.56 - 2.50)	<0.001
Triple negative	1.30 (1.06 - 1.59)	0.011					1.28 (1.04 - 1.57)	0.018		0.96 (0.78 - 1.18)	0.679
Missing	1.18 (0.98 - 1.42)	0.084					1.14 (0.95 - 1.38)	0.166		1.16 (0.96 - 1.39)	0.133
Treatment characteristics (TT)
Surgery type
Mastectomy	1.00 (Ref)		0.44
Breast conserving	0.89 (0.77 - 1.04)	0.141
No surgery	0.39 (0.13 - 1.22)	0.107
Missing	0.90 (0.66 - 1.23)	0.506
Radiotherapy
No	1.00 (Ref)		0.03							1.00 (Ref)		0.04
Yes	0.18 (0.11 - 0.30)	<0.001								0.25 (0.15 - 0.44)	<0.001
Missing	0.32 (0.04 - 2.24)	0.249								0.30 (0.04 - 2.11)	0.225
Tamoxifen treatment
No	1.00 (Ref)		0.11							1.00 (Ref)		0.1
Yes	0.38 (0.29 - 0.51)	<0.001								0.49 (0.37 - 0.66)	<0.001
Missing	0.37 (0.05 - 2.60)	0.316								0.40 (0.06 - 2.87)	0.364
Herceptin treatment
No	1.00 (Ref)		0.38							1.00 (Ref)		0.4
Yes	0.32 (0.26 - 0.40)	<0.001								0.25 (0.20 - 0.31)	<0.001
Missing	0.32 (0.12 - 0.87)	0.025								0.26 (0.10 - 0.69)	0.007
Chemotherapy
Neoadjuvant	1.00 (Ref)		0.08							1.00 (Ref)		0.19
Adjuvant	0.74 (0.63 - 0.86)	<0.001								1.02 (0.85 - 1.21)	0.864
Taxanes
No	1.00 (Ref)		0.13
Yes	0.87 (0.73 - 1.04)	0.135
Anthracyclines
No	1.00 (Ref)		0
Yes	1.64 (1.41 - 1.92)	<0.001
Cyclophosphamide
No	1.00 (Ref)		0.57
Yes	1.79 (1.38 - 2.32)	<0.001
Chemotherapy combinationb
TAC	1.00 (Ref)		0							1.00 (Ref)		<0.001
TC	0.70 (0.58 - 0.83)	<0.001								0.64 (0.53 - 0.78)	<0.001
AC	1.15 (0.95 - 1.40)	0.144								0.93 (0.75 - 1.16)	0.519
T++	0.53 (0.40 - 0.72)	<0.001								0.98 (0.72 - 1.34)	0.896
A++/C++/TA/others/missing	0.54 (0.33 - 0.88)	0.013								0.67 (0.41 - 1.10)	0.112
Granulocyte colony-stimulating factor (GCSF) overall
No	1.00 (Ref)		0
Yes	10.61 (9.16 - 12.30)	<0.001
GCSF before FN
No	1.00 (Ref)		0.02							1.00 (Ref)		0.009
Yes	2.07 (1.81 - 2.36)	<0.001								2.24 (1.93 - 2.60)	<0.001
GCSF before chemotherapy
No	1.00 (Ref)		0.03
Yes	1.04 (0.79 - 1.36)	0.802
GCSF during chemotherapy, before FN
No	1.00 (Ref)		0
Yes	1.98 (1.73 - 2.26)	<0.001
aNUH=National University Hospital, KKH=KK Women’s and Children’s Hospital, TTSH= Tan Tock Seng Hospital, NCCS=National Cancer Centre Singapore, SGH=Singapore General Hospital, CGH=Changi General Hospital, NTFGH=Ng Teng Fong General Hospital, SKH= SengKang General Hospital. bTAC= taxanes+ anthracyclines+ cyclophosphamides, TC=taxanes+ cyclophosphamides, AC= anthracyclines+ cyclophosphamides, TA= t…
