# Supplementary material for: How Asian Breast Cancer Patients Experience Unequal Incidence of Chemotherapy Side Effects: A Look at Ethnic Disparities in Febrile Neutropenia Rates
Source: Cancers (Basel). 2023 Jul 12;15(14):3590. doi: 10.3390/cancers15143590 (PMC10377556; doi:10.3390/cancers15143590)
Supplement: Supplementary file 1 [file cancers-15-03590-s001.zip › Supplementary Table S4.xlsx]

## Sheet: Sheet1
Supplementary Table S4. Associations between ANC and ethnicity among patients without GCSF before chemotherapy, adjusted for age at diagnosis and baseline body mass index (BMI). Baseline BMI was used as a categorical variable: "<18.5", "18.5-<25", "25-30", ">30", and "Missing".Beta values and 95% confidence intervals (CI) were estimated using linear regression models. Bold indicates statistical s…
		Mean (IQRa)	Beta (95% CI)	p
Baseline absolute neutrophil count (ANC, 109/L) (n=4499)
	Chinese	4.23 (3.15 - 5.05)	1.00 (Ref)
	Malay	4.58 (3.38 - 5.52)	0.24 (0.09 – 0.38)	0.001
	Indian	5.00 (3.83 - 5.89)	0.65 (0.46 – 0.84)	<0.001
Maximum ANC decrease (109/L) (n=4340)
	Chinese	2.50 (1.34 - 3.41)	1.00 (Ref)
	Malay	2.77 (1.62 - 3.82)	0.23 (0.07- 0.40)	0.004
	Indian	3.03 (1.77 - 4.07)	0.50 (0.29 - 0.71)	<0.001
aIQR=Inter-quartile range
