# Supplementary material for: How Asian Breast Cancer Patients Experience Unequal Incidence of Chemotherapy Side Effects: A Look at Ethnic Disparities in Febrile Neutropenia Rates
Source: Cancers (Basel). 2023 Jul 12;15(14):3590. doi: 10.3390/cancers15143590 (PMC10377556; doi:10.3390/cancers15143590)
Supplement: Supplementary file 1 [file cancers-15-03590-s001.zip › Supplementary Table S5.xlsx]

## Sheet: ST4-Interaction
Supplementary Table S5. Models showing two-way interaction between ethnicity and other variables significant in the univariable model. Hazard ratios (HR) and 95% confidence intervals (CI) were estimated using Cox regression models.
	HR (95% CI)	P	Model Cox.zph
Model 1: Ethnicity * baseline absolute neutrophil count (ANC)			0
Ethnicity
Chinese	1.00 (Ref)
Malay	2.49 (1.30 - 4.79)	0.006
Indian	1.53 (0.63 - 3.69)	0.347
Baseline ANCa	0.94 (0.89 - 1.00)	0.049
Interaction
Malay:Baseline ANC	0.88 (0.76 - 1.02)	0.089
Indian:Baseline ANC	1.01 (0.85 - 1.20)	0.913
Model 2: Ethnicity * stage			0.12
Ethnicity
Chinese	1.00 (Ref)
Malay	1.09 (0.68 - 1.73)	0.728
Indian	1.63 (0.92 - 2.86)	0.092
Stage
I	1.00 (Ref)
II	0.99 (0.82 - 1.19)	0.884
III	1.06 (0.87 - 1.30)	0.567
Interaction
Malay:Stage II	1.19 (0.70 - 2.04)	0.518
Indian:Stage II	0.93 (0.48 - 1.79)	0.828
Malay:Stage III	1.02 (0.60 - 1.76)	0.932
Indian:Stage III	0.89 (0.45 - 1.77)	0.743
Model 3: Ethnicity * subtype			0.06
Ethnicity
Chinese	1.00 (Ref)
Malay	1.15 (0.79 - 1.66)	0.46
Indian	1.53 (0.97 - 2.43)	0.069
Subtype
Luminal A	1.00 (Ref)
Luminal B (HER2-neg)	1.11 (0.90 - 1.37)	0.311
Luminal B (HER2-pos)	1.37 (0.81 - 2.31)	0.243
HER2-overexpressed	1.17 (0.92 - 1.49)	0.188
Triple negative	1.29 (1.03 - 1.63)	0.029
Missing	1.11 (0.89 - 1.37)	0.354
Interaction
Malay:Luminal B (HER2-neg)	1.01 (0.60 - 1.68)	0.974
Indian:Luminal B (HER2-neg)	0.99 (0.51 - 1.91)	0.968
Malay:Luminal B (HER2-pos)	0.45 (0.06 - 3.50)	0.443
Indian:Luminal B (HER2-pos)	0.58 (0.07 - 4.64)	0.61
Malay:HER2-overexpressed	0.53 (0.26 - 1.09)	0.083
Indian:HER2-overexpressed	1.33 (0.64 - 2.74)	0.44
Malay:Triple Neg	1.04 (0.58 - 1.89)	0.89
Indian:Triple Neg	0.86 (0.43 - 1.70)	0.658
Malay:Missing	1.55 (0.94 - 2.56)	0.088
Indian:Missing	0.86 (0.41 - 1.81)	0.682
Model 4: Ethnicity * radiotherapy			0.02
Ethnicity
Chinese	1.00 (Ref)
Malay	1.17 (0.98 - 1.40)	0.087
Indian	1.46 (1.16 - 1.83)	0.001
Radiotherapy
No	1.00 (Ref)
Yes	0.17 (0.10 - 0.31)	<0.001
Missing	0.00 (0.00 - Inf)	0.988
Interaction
Malay:Yes radiotherapy	0.00 (0.00 - Inf)	0.981
Indian:Yes radiotherapy	3.34 (0.91 - 12.21)	0.069
Malay:Missing radiotherapy	22801425.54 (0.00 - Inf)	0.986
Indian:Missing radiotherapy	0.69 (0.00 - Inf)	1
Model 5: Ethnicity * tamoxifen			0.1
Ethnicity
Chinese	1.00 (Ref)
Malay	1.11 (0.92 - 1.33)	0.274
Indian	1.45 (1.15 - 1.83)	0.002
Tamoxifen
No	1.00 (Ref)
Yes	0.34 (0.24 - 0.47)	<0.001
Missing	0.43 (0.06 - 3.08)	0.403
Interaction
Malay:Yes tamoxifen	2.18 (1.06 - 4.47)	0.034
Indian:Yes tamoxifen	1.39 (0.48 - 3.99)	0.543
Malay:Missing tamoxifen	0.00 (0.00 - Inf)	0.991
Indian:Missing tamoxifen	0.00 (0.00 - Inf)	0.984
Model 6: Ethnicity * herceptin			0.01
Ethnicity
Chinese	1.00 (Ref)
Malay	1.23 (1.02 - 1.48)	0.028
Indian	1.49 (1.17 - 1.90)	0.001
Herceptin
No	1.00 (Ref)
Yes	0.33 (0.26 - 0.42)	<0.001
Missing	0.60 (0.23 - 1.61)	0.314
Interaction
Malay:Yes herceptin	0.86 (0.47 - 1.60)	0.636
Indian:Yes herceptin	1.10 (0.53 - 2.28)	0.8
Malay:Missing herceptin	0.00 (0.00 - Inf)	0.981
Indian:Missing herceptin	0.00 (0.00 - Inf)	0.992
Model 7: Ethnicity * chemotherapy			0.03
Ethnicity
Chinese	1.00 (Ref)
Malay	1.14 (0.79 - 1.64)	0.492
Indian	1.45 (0.92 - 2.29)	0.108
Chemotherapy
Neoadjuvant	1.00 (Ref)
Adjuvant	0.74 (0.62 - 0.88)	<0.001
Interaction
Malay:Adjuvant	1.05 (0.69 - 1.60)	0.812
Indian:Adjuvant	1.04 (0.61 - 1.75)	0.893
Model 8: Ethnicity * anthracycline			0
Ethnicity
Chinese	1.00 (Ref)
Malay	1.44 (0.96 - 2.16)	0.081
Indian	1.93 (1.23 - 3.05)	0.004
Anthracycline
No	1.00 (Ref)
Yes	1.73 (1.45 - 2.06)	<0.001
Interaction
Malay:Yes anthracycline	0.75 (0.48 - 1.18)	0.219
Indian:Yes anthracycline	0.71 (0.42 - 1.20)	0.199
Model 9: Ethnicity * cyclophosphamide			0.05
Ethnicity
Chinese	1.00 (Ref)
Malay	0.34 (0.08 - 1.42)	0.14
Indian	2.19 (1.00 - 4.83)	0.051
Cyclophosphamide
No	1.00 (Ref)
Yes	1.70 (1.28 - 2.25)	<0.001
Interaction
Malay:Yes cyclophosphamide	3.52 (0.85 - 14.61)	0.083
Indian:Yes cyclophosphamide	0.66 (0.29 - 1.51)	0.33
Model 10: Ethnicity * chemotherapy combination			0
Ethnicity
Chinese	1.00 (Ref)
Malay	1.10 (0.89 - 1.37)	0.374
Indian	1.38 (1.04 - 1.83)	0.026
Chemotherapy combinationb
TAC	1.00 (Ref)
TC	0.65 (0.53 - 0.80)	<0.001
AC	1.17 (0.94 - 1.45)	0.165
T++	0.53 (0.38 - 0.73)	<0.001
A++/C++/TA/others/missing	0.59 (0.35 - 0.99)	0.045
Interaction
Malay:TC+	1.60 (0.98 - 2.61)	0.059
Indian:TC+	1.22 (0.64 - 2.31)	0.549
Malay:AC+	0.97 (0.56 - 1.67)	0.913
Indian:AC+	1.04 (0.50 - 2.17)	0.92
Malay:T+	0.45 (0.11 - 1.91)	0.282
Indian:T+	1.89 (0.81 - 4.44)	0.143
Malay:TA+/A+/C+/Other	0.43 (0.06 - 3.31)	0.42
Indian:TA+/A+/C+/Other	1.06 (0.14 - 8.16)	0.958
Model 11: Ethnicity * GCSF before FN			0
Ethnicity
Chinese	1.00 (Ref)
Malay	1.15 (0.93 - 1.44)	0.202
Indian	1.56 (1.18 - 2.07)	0.002
GCSFc before FN
No	1.00 (Ref)
Yes	2.04 (1.75 - 2.37)	<0.001
Interaction
Malay:Yes GCSF before FN	1.20 (0.83 - 1.75)	0.335
Indian:Yes GCSF before FN	0.85 (0.53 - 1.36)	0.489
aANC= Absolute neutrophil count. bTAC= taxanes+ anthracyclines+ cyclophosphamides, TC=taxanes+ cyclophosphamides, AC= anthracyclines+ cyclophosphamides, TA= taxanes+ anthracyclines, T++= taxanes and other drugs (not including anthracyclines/ cyclophosphamides), A++= anthracyclines and other drugs (not including taxanes and cyclophosphamides), C++= cyclophosphamides and other drugs (not including …
